# Supplementary material
Source: PubMed Central journal article supplement (PMC4671735)
Supplement: PulmCirc-005-610.s003.pdf [file PulmCirc-005-610.s003.pdf]

Dear Dr. \_\_\_\_\_,

Your patient \_\_\_\_\_, a \_\_\_\_\_ year old \_\_\_\_\_ with \_\_\_\_\_ CAD was referred to us for an advanced cardiopulmonary exercise test to evaluate dyspnea. She has \_\_\_\_\_ cardiac risk factors.

The patient's resting ECG was \_\_\_\_\_. She was on the following medications at the time of testing: \_\_\_\_\_.

Exercise Protocol:

\_\_\_\_\_ exercised for \_\_\_\_:\_\_\_\_ minutes of a \_\_\_\_-watt/min ramp cycle protocol to a maximum of \_\_\_\_\_ watts. Oxygen saturation was measured at rest and stress using a pulse-oximeter. The heart rate increased from \_\_\_\_\_ at rest to a peak heart rate of \_\_\_\_\_, and the blood pressure increased from \_\_\_\_\_ at rest to \_\_\_\_\_ at peak exercise (RPP: \_\_\_\_\_). Oxygen saturation \_\_\_\_\_ during exercise. Exercise was terminated due \_\_\_\_\_. The symptomatic response to exercise was \_\_\_\_\_ . The blood pressure response was \_\_\_\_\_. The ECG response to exercise was \_\_\_\_\_. \_\_\_\_\_ exercise-induced arrhythmia was observed.

=====

= ANTHROPOMETRICS =

=====

Age:            Gender:    Height:

Weight:        BMI:            Hgb:

=====

= EXERCISE CAPACITY =

=====

Exercise Protocol:       watts/min

Maximum Watts Achieved:

Exercise Duration:

Reason to End Exercise:

-----

                  Predicted    Measured   % of Predicted

-----

Rest VO<sub>2</sub> (mL/min)

AT VO<sub>2</sub> (mL/min)

Peak VO<sub>2</sub> (mL/min)

Peak VO<sub>2</sub>/kg (mL/kg/min)

-----

=====

= CARDIOVASCULAR RESPONSE =

=====

Symptomatic Response:

Blood Pressure Response:

ECG Response:

Stress Induced Arrhythmias:

-----

                  Predicted    Measured   % of Predicted

-----

Rest Heart Rate (bpm)

Peak Heart Rate (bpm)

HR Reserve (bpm)

HR Recovery (1 min)

Rest Blood Press (mm Hg)

Peak Blood Press (mm Hg)

Peak O2 Pulse (mL/beat)

VO2/WR (mL/min/watt)

HR/VO2

Cardiac Output (Qt)

Rest RER

Peak RER

-----

=====

= VENTILATORY RESPONSE =

=====

-----

Measured    Percent

-----

MVV (Measured)

MVV (Calculated)

Respiratory Reserve

VE/VCO2 (Slope)

VE @ AT

VE @ Peak

MVV - VE(peak)

-----  
PRE-SPIROMETRY  
-----

Measured    Percent  
-----

FVC (L)

FEV1 (L)

FEV1/FVC (%)

MVV (L/min)  
-----

=====  
= GAS EXCHANGE VARIABLES =  
=====

-----  
Rest    Peak  
-----

SaO2%

pH

PaCO2 (mmHg)

PaO2 (mmHg)

PETCO2 (mmHg)

P(A-a)O2 (mmHg)

P(a-ET)CO2 (mmHg)  
-----

=====

= ADVANCED CARDIOPULMONARY VITALS =

=====

-----

Time Watts VO2 Qt SvO2 HR SV BP

-----

REST

-----

FW1 (min)

-----

1

2

3

4

5

6

7

-----

PEAK

-----

REC 1 min

REC 2 min

-----

=====  
= ADVANCED CARDIOPULMONARY PRESSURES =  
=====

-----  
Time RAP PASP mPAP PCW PVR TPG Compliance

-----  
REST

-----  
FW1

-----  
1  
2  
3  
4  
5  
6  
7

-----  
PEAK

-----  
REC1

-----  
REC2  
-----

=====

= ADVANCED CARDIOPULMONARY GASES =

=====

-----

Time CaO2 CvO2 Ca-vO2 PaO2 PaCO2 pH Lactate

-----

REST

-----

FW1

-----

1

2

3

4

5

6

7

-----

PEAK

-----

REC1

REC2

-----

In summary, the test results were:

1. Functional Capacity:
2. Peak Heart Rate:
3. Symptomatic Response:
4. Peak Blood Pressure: .
5. Blood Pressure Response: Normal.
6. ECG Response: .
7. Stress-induced Arrhythmia: .
8. SVC supine SO<sub>2</sub>: . PA SO<sub>2</sub>:
9. Baseline K<sup>+</sup>: . Na<sup>+</sup>: .
10. Peak K<sup>+</sup>: . Na<sup>+</sup>: .
11. 1 Min Rec K<sup>+</sup>: . Na<sup>+</sup>: .
12. 2 Min Rec K<sup>+</sup>: . Na<sup>+</sup>: .
13. Peak vPO<sub>2</sub>: . vPCO<sub>2</sub>: . vpH:
14. 1 Hour post Lactate:

CONCLUSION:

Thank you for referring this patient to us.

Sincerely yours,

Attending Physician

**FIGURE 5**
